# Supplementary material
Source: Springer Nature journal article supplement (https://www.springermedizin.de/resource/supplementary/12936_2011_2026_MOESM3_ESM.pdf/9543230)

# Libreville

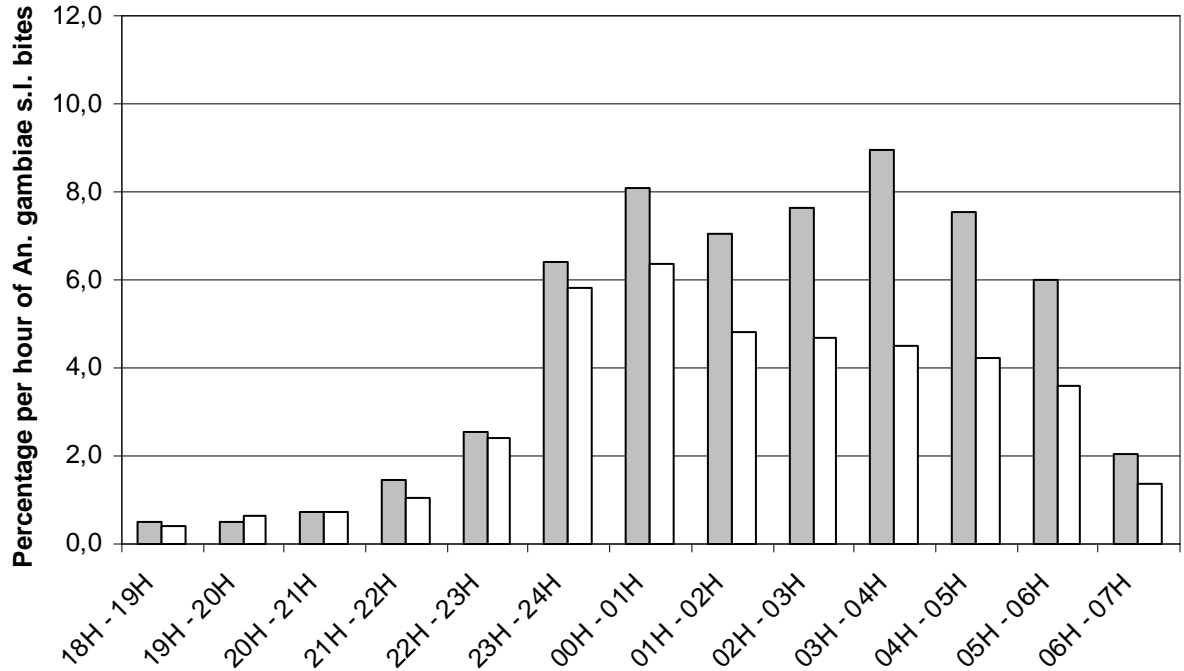

## Camp des Boys

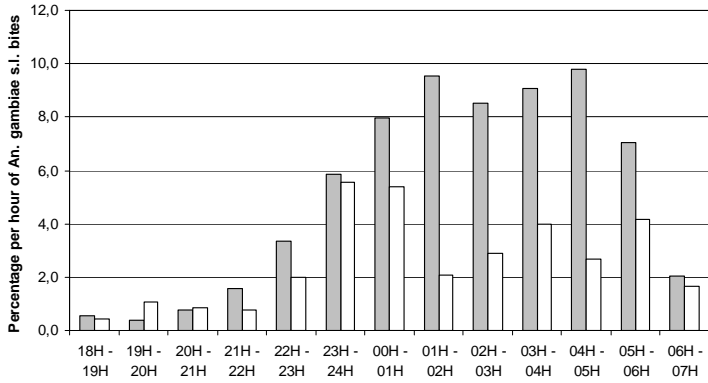

## Alibandeng

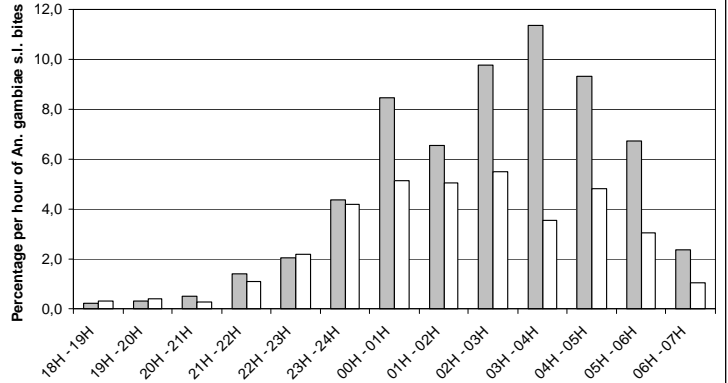

## Beau séjour

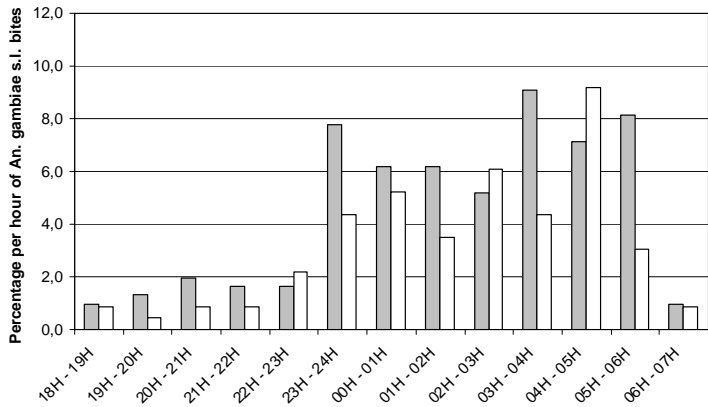

## Sotega

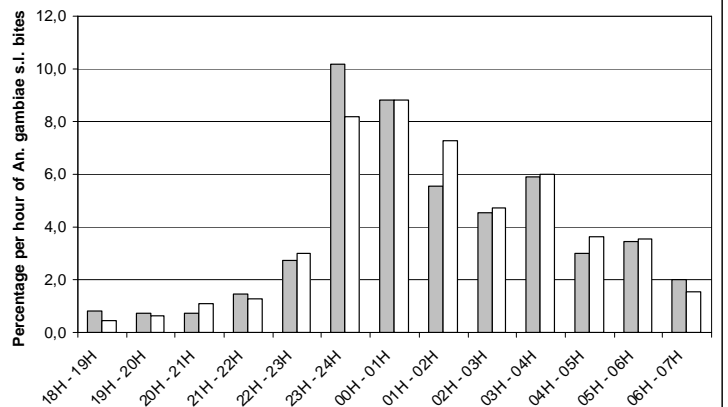

Supplement: MOESM3 [file 9543230]
